# THE JOURNAL OF NEUROPSYCHIATRY and Clinical Neurosciences

The Official Journal of the American Neuropsychiatric Association

## In this issue:

- The Clock Drawing Task: Common Errors and Functional Neuroanatomy
- Psychotic Disorder Due to Traumatic Brain Injury
- The Functional Neuroanatomy of Decision-Making
- Diffusion Tensor Imaging Atlas-Based Analyses in Major Depression After Mild Traumatic Brain Injury
- Associations Between Bilateral Subthalamic Nucleus Deep Brain Stimulation (STN-DBS) and Anxiety in Parkinson's Disease

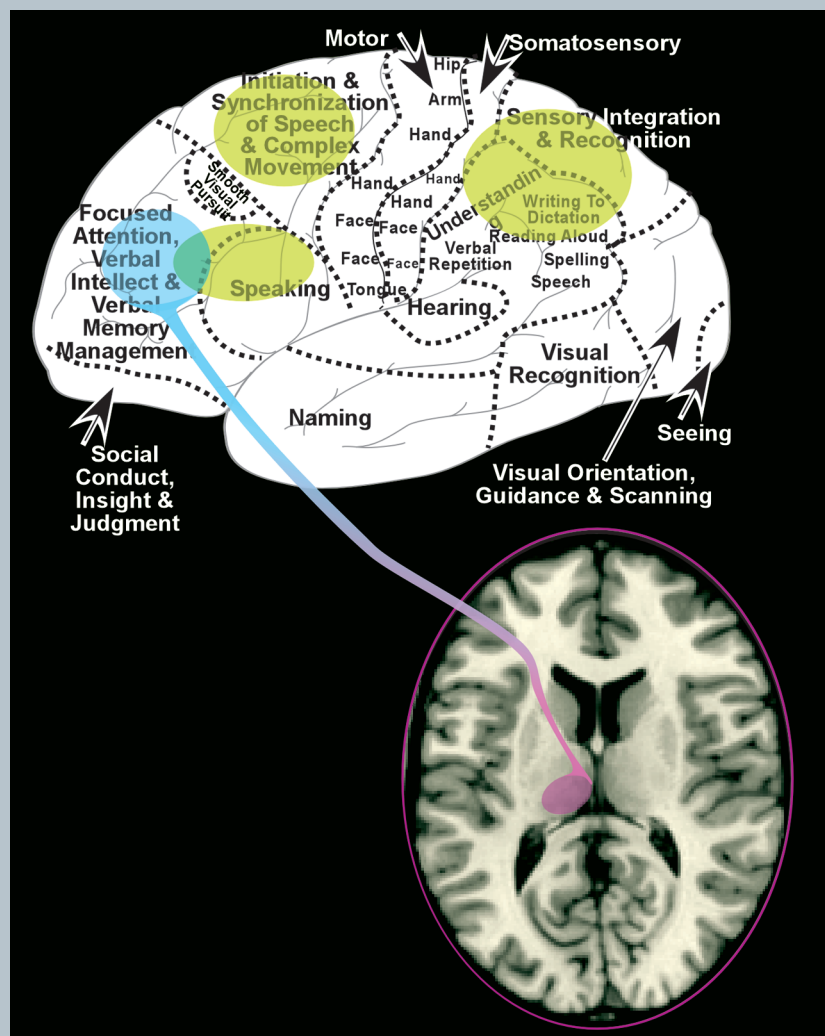

Source: http://neuro.psychiatryonline.org/doi/suppl/10.1176/jnp.2012.24.issue-3/suppl_file/cover.pdf
